# Supplementary material for: Patterns of Healthcare Resource Utilisation of Critical Care Survivors between 2006 and 2017 in Wales: A Population-Based Study
Source: MDPI journal article supplement (doi:10.3390/jcm12030872), 2023-01-21

# Patterns of Healthcare Resource Utilisation of Critical Care Survivors between 2006 and 2017 in Wales: A Population-Based Study

## Diagnostic plots

**Figure S1:** Factors associated with 1-year post-critical care HRU.

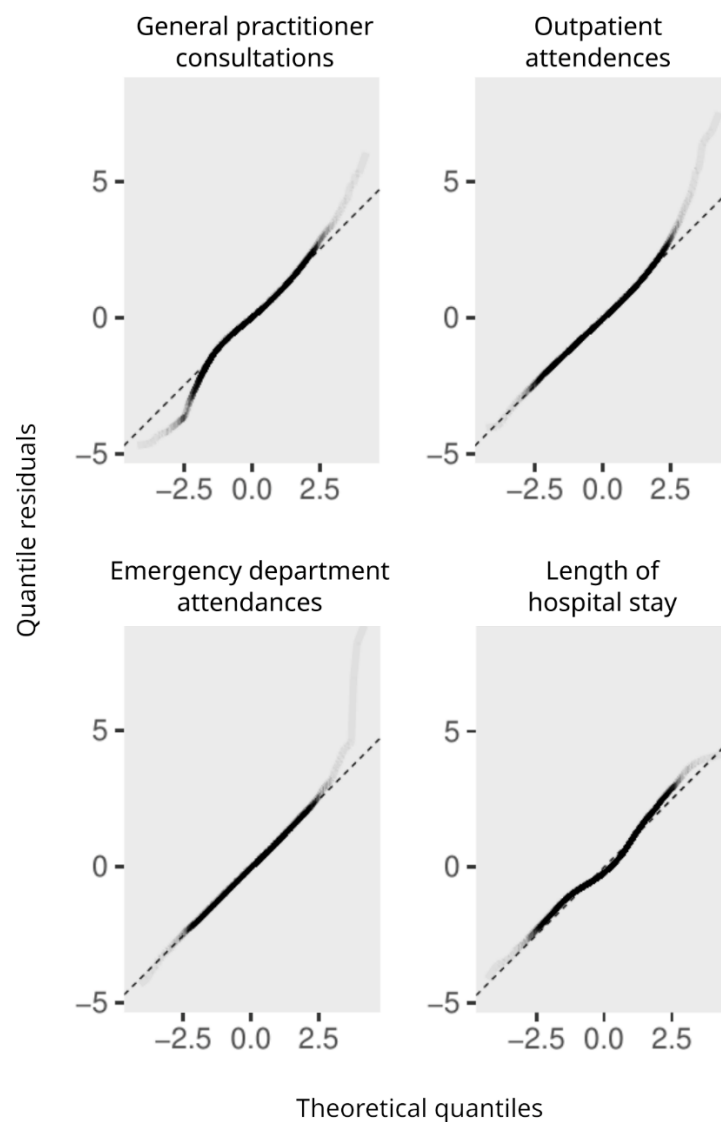

**Figure S2:** Predictors of change in health resource utilisation after critical care.

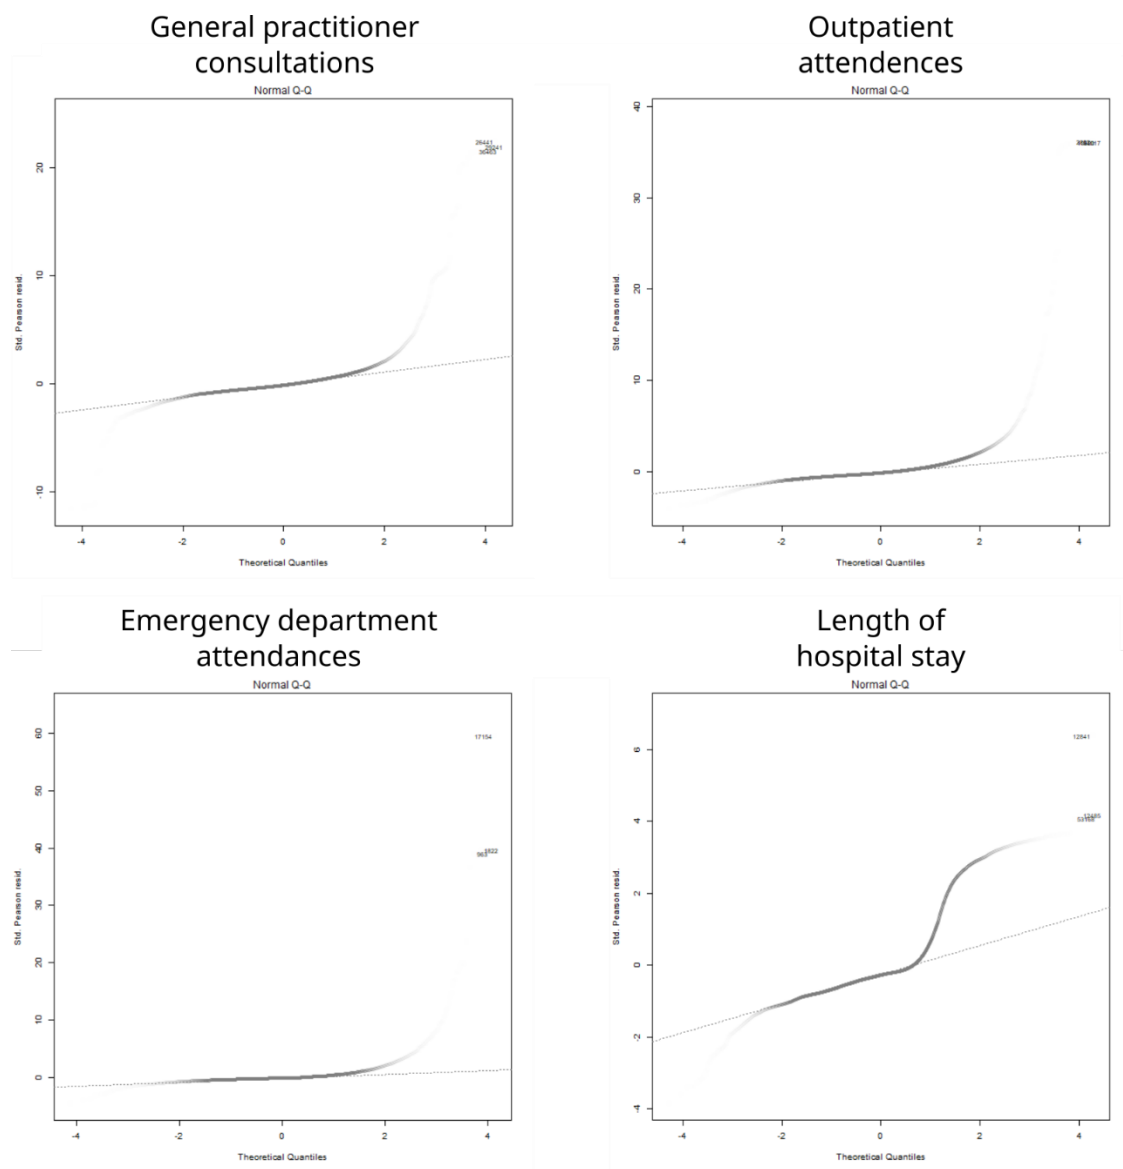

**Figure S3:** Association between critical care admission and health resource utilisation within 1 year of discharge from hospital.

**(A) GP consultations**

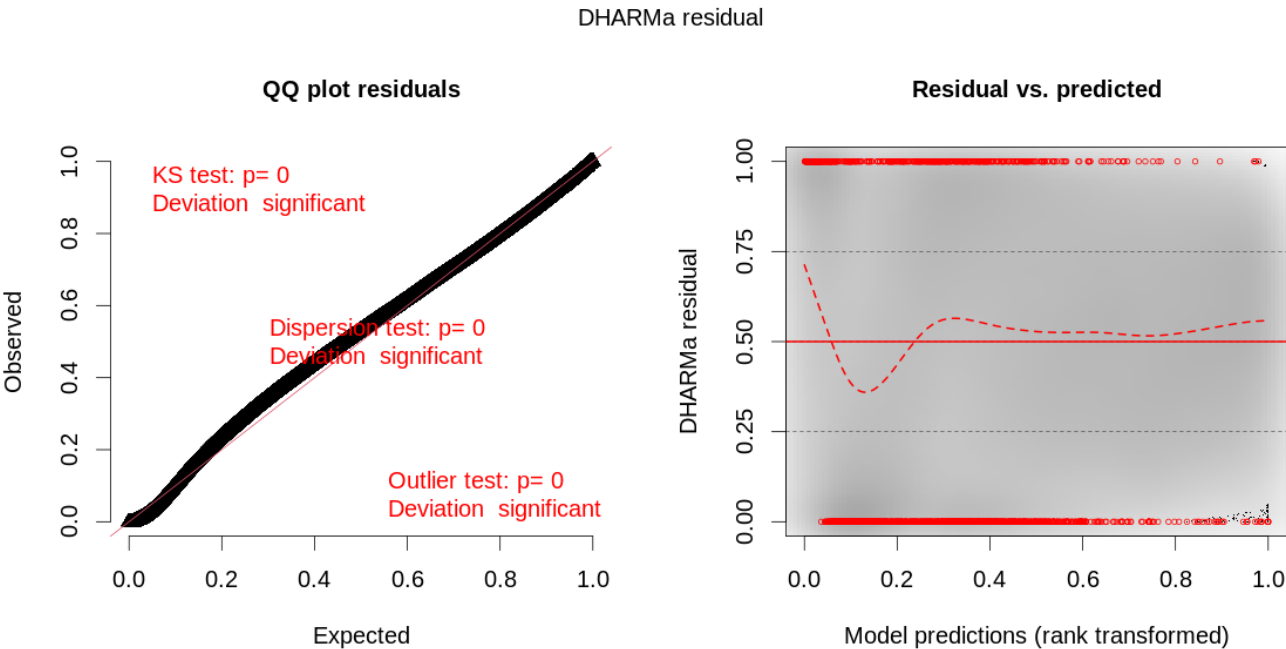

**(B) ED attendances**

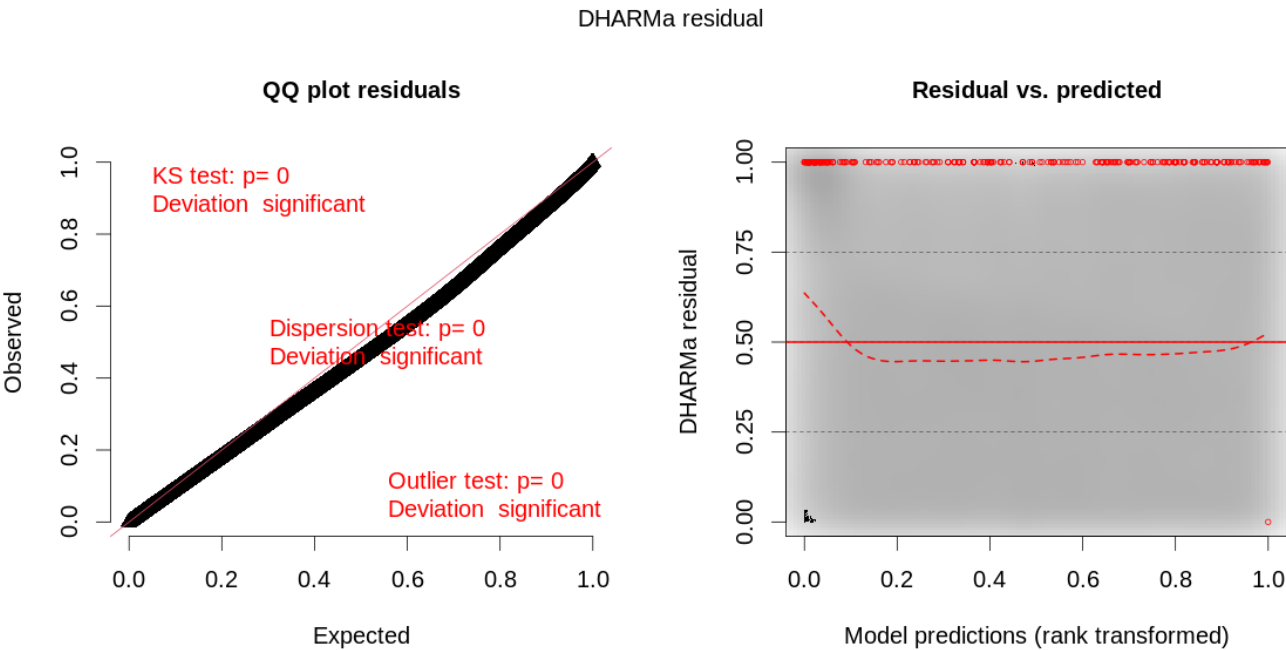

### (C) Outpatient attendances

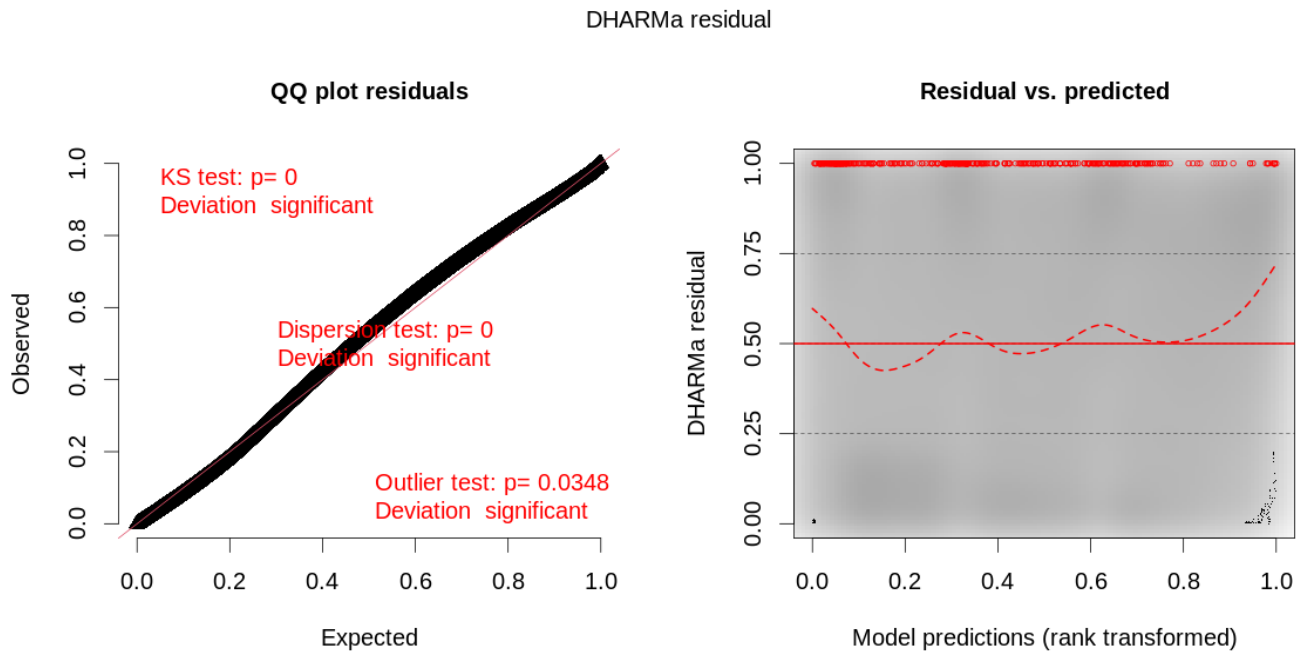

### (D) Length of stay in hospital

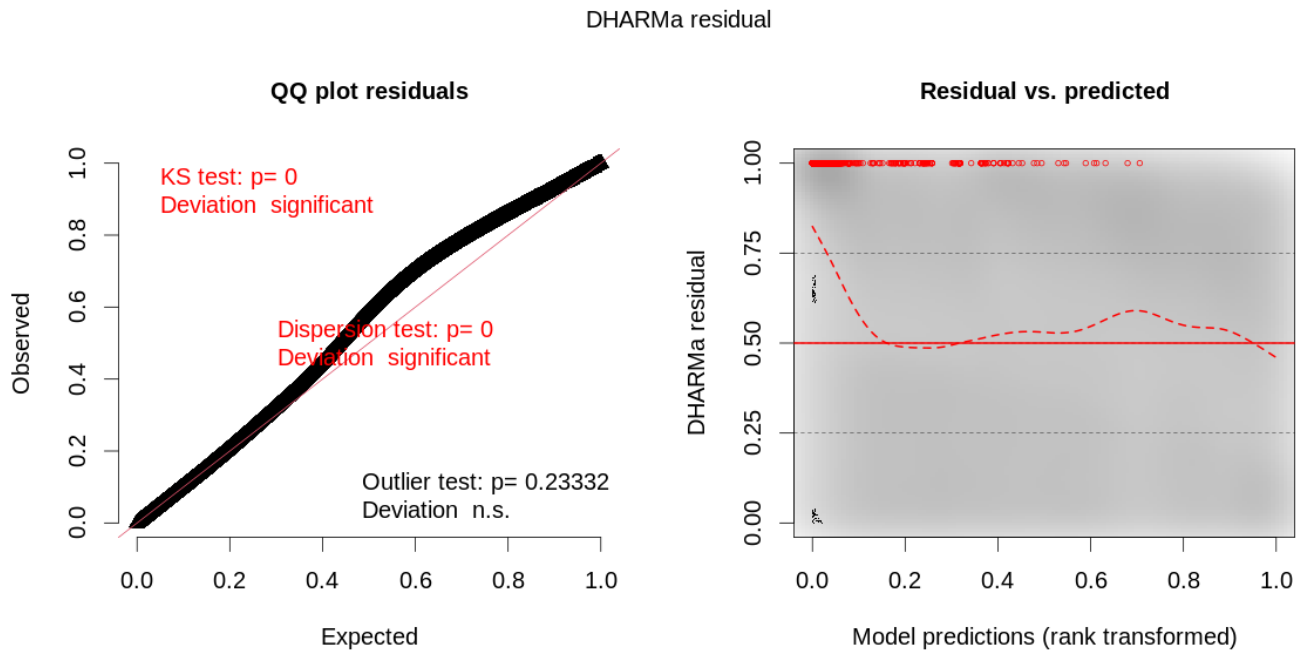

Supplement: s1 [file s1]
